# Supplementary material for: Effects of the Water Extract of Fermented Rice Bran on Liver Damage and Intestinal Injury in Aged Rats with High-Fat Diet Feeding
Source: MDPI journal article supplement (doi:10.3390/plants11050607), 2022-02-24
Supplement: s1 [file s1]

### *Analysis of FRB components*

#### *Liquid chromatographic/mass spectrometric (LC/MS) analysis*

The LC-MS analysis was performed on a Waters Acquity UPLC I-Class system and Vion IMF Quadrupole Time of Flight (QToF) Mass Spectrophotometer. The system was equipped with a Waters BEH C18 Acquity analytical column (75  $\mu\text{m}$   $\times$  150 mm, 1.8  $\mu\text{m}$ ). The column oven temperature was set to 40  $^{\circ}\text{C}$ , and the temperature of the auto-sampler was set to 4  $^{\circ}\text{C}$ . For each LC-HDMSE run, approximately 2  $\mu\text{L}$  of sample (1 mg/mL) was loaded into the column through a 20- $\mu\text{L}$  sample-loop using 98% of mobile phase A (0.1% formic acid in  $\text{H}_2\text{O}$ ) at a flow rate of 0.4 mL/min with a gradient elution consisting of an increase from 20% to 46% of mobile phase B (0.1% formic acid in acetonitrile (ACN)) over 25 min, and a re-equilibration step at 20% of mobile phase B for 10 min. The lock mass, 200 fmol/ $\mu\text{L}$  of [Leu] solution prepared with 0.1% formic acid in 30% ACN, was delivered from the auxiliary pump at a flow rate of 0.2  $\mu\text{L}/\text{min}$  to the reference sprayer of the LockSpray source.

LC-HDMSE data were acquired in resolution mode with the UNIFI Scientific Information System. MS was operated in resolution mode with a typical resolving power of at least 40,000 FWHM at  $m/z$  500. All analyses were performed using positive mode electrospray ionization (ESI) using a LockSpray source. The lock mass channel was sampled every 60 s. MS was calibrated with a Leu solution (200 fmol/ $\mu\text{L}$ ) delivered through the reference sprayer of the LockSpray source. Accurate mass LC-HDMSE data were acquired in alternating, low energy (MS) and high energy (MSE) modes of acquisition with a mass scan range of from  $m/z$  50 to 1000, using a capillary voltage of 2 kV, a source temperature of 150  $^{\circ}\text{C}$ , and a cone voltage of 30 V. The mass measured accuracy was  $<5$  ppm when the instrument was operated with the lock mass, and the accuracy was the same between the low-energy and high-energy MS scans. The spectral acquisition time in each mode was 1.0 s with a 0.1-s inter-scan delay. In the low-energy HDMS mode, data were collected at a constant collision energy of 2 eV in both the trap cell and transfer cell. In the high-energy HDMSE mode, the collision energy was ramped up from 15 to 30 eV in the transfer cell only.

#### *Nutrition analysis*

The nutritional ingredients of FRB were measured by Société Générale de Surveillance (SGS) Food Laboratory (SGS, Kaohsiung, Taiwan) according to instructions of the Association of Official Analytical Communities (AOAC), Chinese National Standards (CNS) and Taiwan Ministry of Health and Welfare (MOHW). Test items included energy, protein and amino acid composition, fat (saturated fatty acids (FAs), trans FAs and FA composition), carbohydrate (sugars and fibers), moisture, ash, sodium, etc.

**Supplementary Table S1.** LC/MS analysis of the water extract of fermented rice bran (FRB)

| Component name                                                   | Response | Mass error (ppm) | Observed m/z | Observed RT (min) |
|------------------------------------------------------------------|----------|------------------|--------------|-------------------|
| Gramisterol                                                      | 871446   | -0.2             | Identified   | 413.3777          |
| Momor-cerebroside I                                              | 570028   | 0.2              | Identified   | 844.6874          |
| 24-Ethyl cholesterol                                             | 220305   | -3.7             | Identified   | 415.3919          |
| Aristolone                                                       | 91060    | 0.5              | Identified   | 219.1745          |
| Siraitic acid C                                                  | 78278    | -4.4             | Identified   | 441.298           |
| Cyclolaudenone                                                   | 69508    | 0.2              | Identified   | 439.3935          |
| (24S)-5 $\alpha$ ,8 $\alpha$ -Epidioxy-ergost-6-en-3 $\beta$ -ol | 52815    | 0.4              | Identified   | 431.3522          |
| Phosphatidyl ethanolamines                                       | 51017    | -4.3             | Identified   | 746.5663          |
| Lotaustralin                                                     | 46075    | 1.8              | Identified   | 262.129           |
| Heterodendrin                                                    | 46075    | 1.8              | Identified   | 262.129           |
| Kulactone                                                        | 42421    | -4.4             | Identified   | 453.3343          |
| Vitamin B5                                                       | 41627    | 1.5              | Identified   | 220.1183          |
| Parkeol                                                          | 39478    | -1.5             | Identified   | 427.3928          |
| $\Delta$ 7-Stigmasterol                                          | 36768    | 0.8              | Identified   | 411.3625          |
| (E)-Hexadecyl-ferulate                                           | 36420    | 0.5              | Identified   | 419.3158          |
| Deoxycholic acid                                                 | 32860    | -5.3             | Identified   | 393.2979          |
| Aristolone                                                       | 32318    | 1.5              | Identified   | 219.1747          |
| Chrysotoxine                                                     | 28741    | -7.7             | Identified   | 319.1516          |
| Patuletin-7-O-[6"-(2-methylbutyryl)]-glucoside                   | 28284    | 1                | Identified   | 565.1558          |
| Phosphatidyl ethanolamines                                       | 25646    | -4.2             | Identified   | 746.5663          |
| 2-Monolinolein                                                   | 23816    | -2               | Identified   | 355.2836          |
| Ocotillol acetate                                                | 21532    | 0.7              | Identified   | 503.4099          |
| Chebuloide II                                                    | 20322    | -1.6             | Identified   | 667.4041          |
| o-Coumaric acid                                                  | 19937    | 2.5              | Identified   | 165.055           |
| Folinic acid                                                     | 18438    | 0.6              | Identified   | 474.1734          |
| Bis(2-ethylhexyl) phthalate                                      | 17776    | 2.8              | Identified   | 391.2854          |
| Methyl cinnamate                                                 | 16213    | 1                | Identified   | 163.0755          |
| Phthalic anhydride                                               | 15948    | 2                | Identified   | 149.0236          |
| Nicotinic acid                                                   | 15792    | 1.1              | Identified   | 124.0394          |
| Apigenin-7-O- $\beta$ -D-glucuronopyranoside                     | 15566    | 1                | Identified   | 445.1134          |
| Dulcitol                                                         | 15262    | 0.4              | Identified   | 183.0864          |
| Alisol A                                                         | 14498    | 1.4              | Identified   | 491.3738          |
| Deoxycholic acid                                                 | 14202    | -5.3             | Identified   | 393.2979          |
| Pantothenic acid                                                 | 13723    | 1.4              | Identified   | 248.1496          |
| Trichosanic acid                                                 | 13648    | 1.2              | Identified   | 279.2322          |
| Prunasine                                                        | 12514    | -0.3             | Identified   | 296.1128          |
| 4-Feruloylquinic acid                                            | 12237    | -0.9             | Identified   | 369.1177          |
| p-Tolualdehyde                                                   | 11985    | 2.4              | Identified   | 123.0444          |
| Stearidonic acid                                                 | 11732    | 0.3              | Identified   | 277.2163          |
| Pachymic acid                                                    | 11257    | 2.1              | Identified   | 529.3899          |
| Stigmastan-3,6-dione                                             | 10550    | -1               | Identified   | 429.3723          |
| Patuletin-7-O-[6"-(2-methylbutyryl)]-glucoside                   | 10278    | -0.2             | Identified   | 565.1551          |
| (-)-Epiafzelechin-3-O- $\beta$ -D-allopyranoside                 | 10202    | -7.1             | Identified   | 437.1411          |
| Cynatratoside B                                                  | 9840     | 5.2              | Identified   | 779.4253          |
| n-Butyl benzoate                                                 | 9584     | 2.2              | Identified   | 179.107           |
| Cynatratoside B                                                  | 9353     | 5.5              | Identified   | 779.4255          |
| 9,16-Dioxyhydroxy-10,12,14-triene-18 carbonic acid               | 9059     | -5.1             | Identified   | 311.2201          |
| Gigantol                                                         | 9033     | -8.1             | Identified   | 261.11            |
| Mahuannin G                                                      | 8736     | 8.2              | Identified   | 543.133           |

|                                                                                        |      |      |            |          |
|----------------------------------------------------------------------------------------|------|------|------------|----------|
| Glycocholic acid                                                                       | 8588 | 0    | Identified | 466.3163 |
| Glycodeoxycholic acid                                                                  | 8450 | -9.6 | Identified | 450.3171 |
| 2-Hydroxybenzyl-3-hydroxybenzoate                                                      | 8195 | -9.4 | Identified | 245.0785 |
| Thannilignan                                                                           | 8191 | -3   | Identified | 331.153  |
| Parkeol                                                                                | 7935 | -2.7 | Identified | 427.3923 |
| Methyl cinnamate                                                                       | 7838 | 1.5  | Identified | 163.0756 |
| (22E,24R)-5 $\alpha$ ,8 $\alpha$ -Epidioxyergosta-6,9,22-trien-3 $\beta$ -ol           | 7746 | -8.7 | Identified | 427.3169 |
| Siraitic acid C                                                                        | 7727 | -4.8 | Identified | 441.2978 |
| Stearidonic acid                                                                       | 7571 | 0.6  | Identified | 277.2164 |
| Alisol F                                                                               | 7256 | 2.1  | Identified | 489.3585 |
| 2-Amino-3-(3,4-dihydroxyphenyl)-propanoic acid ethyl ester                             | 7201 | 2.3  | Identified | 226.1079 |
| Alisol I                                                                               | 7189 | -3.6 | Identified | 455.3503 |
| Kuraridinol                                                                            | 7189 | -8.6 | Identified | 457.2182 |
| (3R,4S)-4',7-Dimethoxy-3'-deoxysappanol                                                | 7188 | 7.3  | Identified | 317.1407 |
| Nobilin C                                                                              | 7180 | -9   | Identified | 335.1459 |
| Terrestriamide                                                                         | 7120 | 8.1  | Identified | 328.1206 |
| Periplocoside O                                                                        | 7110 | 8    | Identified | 649.3998 |
| (-)-Epiafzelechin-3-O- $\beta$ -D-allopyranoside                                       | 7065 | -7.9 | Identified | 437.1408 |
| Diisobutyl phatel (DIBP)                                                               | 6993 | 0.7  | Identified | 279.1593 |
| N-Methylantranilic acid                                                                | 6976 | 2.7  | Identified | 152.071  |
| 2-Amino-benzoic acid                                                                   | 6912 | 2.4  | Identified | 138.0553 |
| Cycloartanol                                                                           | 6862 | -5.1 | Identified | 429.4069 |
| 2-Amino-3-(3,4-dihydroxyphenyl)-propanoic acid methyl ester                            | 6716 | 2.7  | Identified | 212.0923 |
| Luteolin-7-O-[ $\beta$ -D-apiofuranosyl(1 $\rightarrow$ 6)] $\beta$ -D-glucopyranoside | 6620 | 1.2  | Identified | 581.1508 |
| Stigmast-4-ene-3,6-dione                                                               | 6515 | -2.9 | Identified | 427.3558 |
| Stearidonic acid                                                                       | 6454 | 0.5  | Identified | 277.2163 |
| 9,16-Dioxyhydroxy-10,12,14-triene-18 carbonic acid                                     | 6444 | -5.8 | Identified | 311.2199 |
| Tenacigenin C                                                                          | 6394 | 2.1  | Identified | 383.2436 |
| Chrysotoxine                                                                           | 6355 | -7   | Identified | 319.1518 |
| 24-Methylenelanost-8-en-3 $\beta$ -ol                                                  | 6316 | -9.8 | Identified | 441.4048 |
| 9,16-Dioxyhydroxy-10,12,14-triene-18 carbonic acid                                     | 6287 | -2.9 | Identified | 311.2208 |
| 9,16-Dioxyhydroxy-10,12,14-triene-18 carbonic acid                                     | 6276 | -6.6 | Identified | 311.2196 |
| 16-Oxo alisol A                                                                        | 6230 | -4.3 | Identified | 505.3502 |
| Diosgenin acetate                                                                      | 6159 | -5.6 | Identified | 457.3287 |
| Atratoside A                                                                           | 6115 | -5.7 | Identified | 777.4375 |
| Stearidonic acid                                                                       | 6046 | -1.5 | Identified | 277.2158 |
| Daturametelin D                                                                        | 6028 | -4.7 | Identified | 437.2666 |
| Delamide                                                                               | 5960 | 4.5  | Identified | 265.1195 |
| Ethyl linoleate                                                                        | 5941 | 2.2  | Identified | 309.2795 |
| Hydroginkgolic acid                                                                    | 5902 | 1.6  | Identified | 335.2586 |
| (E)-Ferulic acid hexacosyl ester                                                       | 5848 | 3.2  | Identified | 559.4739 |
| Coronanic acid                                                                         | 5823 | -4.7 | Identified | 297.241  |
| L-Noradrenaline                                                                        | 5788 | 3.4  | Identified | 170.0818 |
| 9,16-Dioxyhydroxy-10,12,14-triene-18 carbonic acid                                     | 5737 | -4.1 | Identified | 311.2204 |
| 6-Gingerdione                                                                          | 5679 | -0.2 | Identified | 293.1747 |
| 9,16-Dioxyhydroxy-10,12,14-triene-18 carbonic acid                                     | 5629 | -5   | Identified | 311.2201 |
| (3-Methoxycarbonylamino-4-methylphenyl)-carbamic acid methyl ester                     | 5619 | 0.1  | Identified | 239.1026 |
| Di (2-ethyl butyl) phthalate                                                           | 5395 | -6.6 | Identified | 335.2195 |
| Neomangiferin                                                                          | 5389 | -2.5 | Identified | 585.1436 |
| 16 $\beta$ -Methoxyalisol B 23-acetate                                                 | 5388 | -0.6 | Identified | 545.3833 |

RT, retention time.

**Supplementary Table S2.** Amino acid compositions of the water extracts of rice bran (RB) and fermented RB (FRB)

|               |             | <b>RB</b> | <b>FRB</b> |
|---------------|-------------|-----------|------------|
| Alanine       | ppm (mg/kg) | 7090      | 8120       |
| Arginine      | ppm (mg/kg) | 8870      | 6100       |
| Aspartic Acid | ppm (mg/kg) | 10,800    | 12,100     |
| Cystine       | ppm (mg/kg) | 1550      | 1250       |
| Glutamic Acid | ppm (mg/kg) | 16,500    | 16,400     |
| Glycine       | ppm (mg/kg) | 6500      | 6550       |
| Histidine     | ppm (mg/kg) | 3810      | 3460       |
| Isoleucine    | ppm (mg/kg) | 4450      | 5010       |
| Leucine       | ppm (mg/kg) | 8010      | 7460       |
| Lysine        | ppm (mg/kg) | 5400      | 6290       |
| Methionine    | ppm (mg/kg) | 1470      | 1300       |
| Phenylalanine | ppm (mg/kg) | 5230      | 4630       |
| Proline       | ppm (mg/kg) | 5990      | 12,800     |
| Serine        | ppm (mg/kg) | 5090      | 5720       |
| Threonine     | ppm (mg/kg) | 4240      | 5410       |
| Tyrosine      | ppm (mg/kg) | 2500      | 3680       |
| Valine        | ppm (mg/kg) | 6750      | 6580       |
| Tryptophan    | ppm (mg/kg) | 1390      | 1510       |
| GABA          | (mg/100g)   | 15.6      | 220.0      |

GABA, gamma-aminobutyric acid.

**Supplementary Table S3.** Fatty acid compositions of the water extracts of rice bran (RB) and fermented RB (FRB)

|                                                                           |         | <b>RB</b> | <b>FRB</b> |
|---------------------------------------------------------------------------|---------|-----------|------------|
| <b>Fatty acids</b>                                                        |         |           |            |
| Tetradecanoic acid (14:0)                                                 | g/100 g | 0.06      | N.D.       |
| Hexadecanoic acid (16:0)                                                  | g/100 g | 2.79      | 0.98       |
| Octadecanoic acid (18:0)                                                  | g/100 g | 0.34      | 0.17       |
| Eicosanoic acid (20:0)                                                    | g/100 g | 0.10      | N.D.       |
| Docosanoic acid (22:0)                                                    | g/100 g | 0.06      | N.D.       |
| Tetracosanoic acid (24:0)                                                 | g/100 g | 0.15      | 0.10       |
| <b>Fatty acids composition</b>                                            |         |           |            |
| Dodecanoic acid (12:0)                                                    | %       | N.D.      | 0.07       |
| Tetradecanoic acid (14:0)                                                 | %       | 0.4       | 0.25       |
| Pentadecanoic acid (15:0)                                                 | %       | N.D.      | 0.09       |
| Hexadecanoic acid (16:0)                                                  | %       | 19.4      | 16.3       |
| 9-Cis-hexadecanoic acid (9c-16:1)                                         | %       | 0.16      | 0.23       |
| Heptadecanoic acid (17:0)                                                 | %       | N.D.      | 0.1        |
| Octadecanoic acid (18:0)                                                  | %       | 2.33      | 3.74       |
| 9-Cis-octadecanoic acid (9c-18:1)                                         | %       | 44.9      | 39.6       |
| 11-Cis-octadecanoic acid (11c-18:1)                                       | %       | 1         | 1.06       |
| 9,12-Cis-octadecadienoic acid (9c, 12c-18:2)                              | %       | 27.6      | 31.9       |
| 9,12, 15-Cis-octadecatrienoic acid (9c, 12c, 15c-18:3)                    | %       | 0.9       | 2.13       |
| 9-Trans, 12-cis, 15-cis-octadecatrienoic acid (9t, 12c, 15c-18:3)         | %       | N.D.      | 0.08       |
| 6, 9, 12-Cis-octadecatrienoic acid (6c, 9c, 12c-18:3)                     | %       | N.D.      | 1.03       |
| Eicosanoic acid (20:0)                                                    | %       | 0.72      | 0.68       |
| 11-Cis-eicosanoic acid (11c-20:1)                                         | %       | 0.65      | 0.52       |
| Docosanoic methyl ester (22:0)                                            | %       | 0.49      | 0.68       |
| 7, 10, 13, 16, 19-Cis-docosapentaenoic acid (7c, 10c, 13c, 16c, 19c-22:5) | %       | 0.18      | N.D.       |
| Tetracosanoic acid (24:0)                                                 | %       | 1.2       | 1.55       |

The test results "N.D." stand for Limit of Quantification.

**Supplementary Table S4.** Components in the water extracts of rice bran (RB) and fermented RB (FRB)

|                      |             | <b>RB</b> | <b>FRB</b> |
|----------------------|-------------|-----------|------------|
| Energy               | (kcal/100g) | 426.3     | 285.3      |
| Protein              | (g/100g)    | 12.9      | 15.5       |
| Fat                  | (g/100g)    | 14.3      | 5.3        |
| Saturated fatty acid | (g/100g)    | 3.50      | 1.26       |
| Trans fatty acid     | (g/100g)    | N.D.      | N.D.       |
| Total carbohydrates  | (g/100g)    | 61.5      | 43.9       |
| Total sugars         | (g/100g)    | 6.6       | 13.0       |
| Dietary fiber        | (g/100g)    | 19.1      | 6.2        |
| Moisture             | (g/100g)    | 4.5       | 14.3       |
| Ash                  | (g/100g)    | 6.8       | 21.0       |
| Sodium               | (mg/100g)   | 5.1       | 72.0       |
| Calcium              | ppm (mg/kg) | 506       | 1630       |
| Phosphorus           | ppm (mg/kg) | 16,400    | 51,100     |

The test results "N.D." stand for Limit of Quantification.
